# Supplementary material
Source: PubMed Central journal article supplement (PMC4251817)
Supplement: NIHMS619685-supplement-SI.pdf [file NIHMS619685-supplement-SI.pdf]

Supporting Information for:

**EPR and Mössbauer Spectroscopy Show Inequivalent Hemes in Tryptophan Dioxygenase.**

Rupal Gupta, Rong Fu, Aimin Liu, Michael P. Hendrich

14. Forouhar, F.; Anderson, J. L. R.; Mowat, C. G.; Vorobiev, S. M.; Hussain, A.; Abashidze, M.; Bruckmann, C.; Thackray, S. J.; Seetharaman, J.; Tucker, T.; Xiao, R.; Ma, L.-C.; Zhao, L.; Acton, T. B.; Montelione, G. T.; Chapman, S. K.; Tong, L., *Proc. Natl. Acad. Sci.* **2007**, *104*, 473–478.
